# Supplementary material for: Plants from the abandoned Nacozari mine tailings: evaluation of their phytostabilization potential
Source: PeerJ. 2017 May 4;5:e3280. doi: 10.7717/peerj.3280 (PMC5420198; doi:10.7717/peerj.3280)
Supplement: Data S1 — Raw data on the abundance of perennial and annual plant species, physicochemical properties of tailings, growth of Amaranthus watsonii and Prosopis velutina and metal concentration in rhizosphere and leaves of plants growing in the Nacozari tailings. [file peerj-05-3280-s001.xls]

## Sheet: Patch size
Patch number	Length 1	Length 2
1	31.80 m	25.70 m
2	23.60 m	1.50 m
3	41.00 m	20.50 m
4	7.30 m	5.90 m

## Sheet: Abundance perennials
Acacia farnesiana (number of individuals/plot							Gnaphalium leucocephalum							Baccharis sarothroides						Brickellia coulteri							Prosopis velutina
	Patch 1	Patch 2	Patch 3	Patch 4			Patch 1	Patch 2	Patch 3	Patch 4				Patch 1	Patch 2	Patch 3	Patch 4			Patch 1	Patch 2	Patch 3	Patch 4				Patch 1	Patch 2	Patch 3	Patch 4
plot 1	22	41	13	2			5	2	0	0				1	0	0	7			0	1	1	0				0	1	0	0
plot 2	20	1	7	3			10	0	0	0				5	3	0	0			4	1	1	0				0	0	0	0
plot 3	34	9	7	2			6	1	1	0				3	4	0	0			2	4	1	0				0	0	0	0
plot 4	8	2	1				0	0	0					1	4	0				0	1	6					0	0	2
plot 5	30	12	0				1	0	0					3	1	0				0	0	0					0	0	5
plot 6	45	14	2				0	0	0					1	8	0				0	0	0					0	0	3
plot 7	60	6	3				0	0	0					2	2	0				0	3	0					0	0	1
plot 8	31	1	0				0	1	0					0	1	0				0	5	4					0	0	0
plot 9	4	4	2				2	1	0					1	2	0				0	3	4					0	0	0
plot 10	7	0	1				0	0	0					0	1	0				0	14	0					0	0	0
plot 11	38	4	0				6	0	0					8	2	0				4	9	0					0	0	2
plot 12	10	3	0				0	0	0					0	4	0				3	8	0					0	0	1
plot 13	3	2	5				15	0	0					0	2	0				1	8	0					0	0	0
plot 14	23	0					5	2						4	0					4	1						0	1
plot 15	0	5					0	0						0	5					0	0						0	1
plot 16	8						1							0						6							0
plot 17	22						3							2						7							0
plot 18	4						0							1						2							0
plot 19	7						8							2						1							0
plot 20	9						0							0						3							0
plot 21	1						0							0						7							0
plot 22	2						8							0						0							0
plot 23	0						0							0						0							0
plot 24	0						0							0						0							0
plot 25	0						0							0						0							0
plot 26	2						0							0						0							0
plot 27	1						0							1						0							0
plot 28	0						30							0						0							0
plot 29	0						0							0						7							0
plot 30	0						0							0						0							0
Plots: 10 x 10 m

## Sheet: Abundance annuals
	Patch 1 (number of individuals)								Patch 2 (number of individuals)									Patch 3 (number of individuals)								Patch 4 (number of individuals)
	Plot 1	Plot 2	Plot 3	Plot 4	Plot 5	Plot 6			Plot 1	Plot 2	Plot 3	Plot 4	Plot 5	Plot 6				Plot 1	Plot 2	Plot 3	Plot 4	Plot 5	Plot 6			Plot 1	Plot 2	Plot 3
Amaranthus watsonii	91		6						1					1					19		77	1	1			4		4
Boerhavia coulteri	1		17			44					6																	2
Solanum lumholtzianum				42	3																					1		4
Bromus catharticus	31	10		2
1 m x 1 m plots

## Sheet: Physicochemical prop
	pH	Electric conductivity	Sand (%)	Silt (%)	Clay (%)	As	Ba	Ca	Cu	Fe	K	Mn	Mo	Pb	Rb	Sr	Ti	Zn	Zr
Patch 1 with vegetation	5.08	91.7	71.2	20.6	8.2	19.6967	1053.22	2849.94	206.517	22034	34583.5	207.72	53.3233	39.1033	244.89	121.497	1519.55	0	139.893
Patch 2 with vegetation	4.43	139.8	78.6	17.8	3.6	18.8267	1156.08	733.937	271.84	27634.7	37559.3	220.783	52.5667	24.4433	268.587	68.84	1471.22	0	150.047
Patch 3 with vegetation	4.73	294	77.6	14	8.4	21.47	1041.38	5649.15	426.92	35982	34584.6	261.743	82.8033	28.6467	256.843	112.25	1865.25	73.5133	136.507
Patch 4 with vegetation	4.62	119.9	84	13.2	2.8	15.42	1115.66	2258.26	426.13	19019.5	36236.9	205.257	40.3967	39.01	264.797	75.0767	1288.05	66.785	144.32
Adjacent to patch 1 with no vegetation	5.07	99.6	78.8	17.4	3.8	18.69	1180.89	967.533	266.903	26207.1	37751.7	223.643	67.6533	29.9267	260.153	77.0533	1447.78	0	138.52
Adjacent to patch 2 with no vegetation	4.17	128	81.2	10.6	8.2	23.79	1191.89	425.99	336.307	40247.4	36253.1	229.887	62.5567	44.7	251.68	65.6533	1089.65	70.96	130.553
Adjacent to patch 3 with no vegetation	4.43	115.3	84.8	10	5.2	20.5433	1264.32	900.053	275.627	35769.1	38694.8	240.983	77.8567	21.6667	262.573	73.82	1480.48	0	140.07
Adjacent to patch 4 with no vegetation	4.22	108.6	74.4	18.4	7.2	18.6233	1074.03	600.873	436.513	28549.7	40298.7	247.13	84.6733	41.77	250.217	58.6167	1369.66	0	135.193

## Sheet: Amaranthus experiment
Seeds collected at the tailings growing in tailings material					Seeds collected at the tailings, growing in off-site soil
Family 1	Height (cm)	Number of leaves	Total Biomass in g		Family 1	Height (cm)	Number of leaves	Total Biomass in g
1-1-1-1	2.5	3	0.0004		1-1-1-2	7	8	0.0998
1-1-4-1	2	1	0.1139		1-1-3-2	7.5	6	0.0438
1-1-6-1	2.5	1	0.0008		1-1-4-2	9	9	0.0697
1-1-7-1	2	1	0.0008		1-1-5-2	5.5	5	0.00194
					1-1-6-2	5	6	0.0294
					1-1-7-2	6	7	0.0338
Family 2			Total Biomass in g
1-2-1-2	3	3	0.0059
1-2-4-1	2.5	1	0.0012		Family 2			Total Biomass in g
1-2-6-1	3	2	0.0001		1-2-1-2	7.5	9	0.045
1-2-7-1	5.5	4	0.0143		1-2-2-2	10.5	9	0.0993
					1-2-7-2	11.5	13	0.1088
Family 3			Total Biomass in g
1-3-1-1	2.5	4	0.0006		Family 3			Total Biomass in g
1-3-5-1	3.5	1	0.001		1-3-1-2	8.5	6	0.0249
					1-3-2-2	4.5	6	0.025
					1-3-3-2	6.5	8	0.0806
Family 4			Total Biomass in g		1-3-4-2	8.5	9	0.098
1-4-1-1	5	4	0.001
1-4-2-1	3.5	2	0.0153
1-4-3-1	3	3	0.0006
1-4-4-1	3	3	0.0087
1-4-5-1	4.5	3	0.0017
1-4-7-1	2.5	4	0.0094		Family 4			Total Biomass in g
					1-4-2-2	7	7	0.0726
					1-4-3-2	8.5	8	0.0447
Family 5			Total Biomass in g		1-4-4-2	6.5	6	0.0438
1-5-2-1	2.5	2	0.0004		1-4-5-2	7.5	7	0.0697
					1-4-6-2	9.5	5	0.0273
					1-4-7-2	11	9	0.076
Family 6			Total Biomass in g
1-6-1-1	3	4	0.0067
1-6-2-1	1.5	4	0.0042
1-6-3-1	1	1	0.0004		Family 5			Total Biomass in g
1-6-4-1	4.5	4	0.0108
1-6-5-1	7	5	0.0073
1-6-6-1	2.5	4	0.0324
1-6-7-1	3	3	0.0063
					1-5-5-2	5	8	0.0688
Family 7			Total Biomass in g
1-7-1-1	2	1	0.0025
1-7-3-1	5	5	0.0118
1-7-6-1	2	3	0.0025		Family 6			Total Biomass in g
					1-6-1-2	7.5	7	0.053
					1-6-2-2	9	7	0.0926
Family 8			Total Biomass in g		1-6-3-2	2.5	2	0.0006
1-8-1-1	4	4	0.0103		1-6-4-2	7.5	7	0.0564
1-8-2-1	1.5	1	0.0015		1-6-5-2	5	6	0.0373
1-8-6-1	6	4	0.0123		1-6-6-2	6.5	8	0.0283
1-8-7-1	5	5	0.0254		1-6-7-2	4	8	0.0802
Family 9			Total Biomass in g
1-9-2-1	4	3	0.0009		Family 7			Total Biomass in g
1-9-3-1	2.5	2	0.0008		1-7-1-2	5	4	0.0132
1-9-4-1	4	2	0.0016		1-7-3-2	9	7	0.0913
1-9-5-1	3	2	0.002		1-7-4-2	7	6	0.05
1-9-6-1	3	2	0.0006		1-7-6-2	7.5	7	0.0893
1-9-7-1	3	2	0.0014		1-7-7-2	7	7	0.0617
Family 10			Total Biomass in g		Family 8			Total Biomass in g
1-10-1-1	3.5	2	0.0066
1-10-2-1	4.5	2	0.019		1-8-2-2	5	4	0.0094
1-10-4-1	5	3	0.0026		1-8-3-2	8.5	8	0.1065
1-10-5-1	3.5	2	0.0009		1-8-4-2	10	7	0.1199
1-10-6-1	2	2	0.0065		1-8-5-2	9.5	6	0.0557
1-10-7-1	2.5	2	0.0006		1-8-7-2	10	8	0.0975
					Family 9			Total Biomass in g
Seeds collected outside the tailings, growing in tailing material					1-9-1-2	5.5	5	0.0235
					1-9-3-2	8	7	0.1032
					1-9-4-2	10.5	10	0.1311
Family 1	Height (cm)	Number of leaves	Total Biomass in g		1-9-5-2	8	7	0.0516
2-1-1-1	2.5	2	0.0015		1-9-6-2	5	4	0.0076
2-1-2-1	2.5	3	0.0015		1-9-7-2	7.5	6	0.0329
2-1-3-1	2.5	4	0.0085
2-1-4-1	3.5	2	0.0033
2-1-5-1	3.5	3	0.0059		Family 10			Total Biomass in g
2-1-6-1	3	2	0.0023		1-10-1-2	7	5	0.0316
2-1-7-1	4	3	0.0118		1-10-3-2	9	9	0.1615
					1-10-6-2	6	5	0.0202
					1-10-7-2	11	9	0.0814
Family 2			Total Biomass in g
2-2-1-1	7	7	0.0087
2-2-2-1	4	4	0.0087
2-2-3-1	4	4	0.0088
2-2-4-1	3	2	0.004
2-2-6-1	3	2	0.0019
2-2-7-1	2.5	2	0.0012		Seeds collected outside the tailings, growing in off-site soil
					Family 1	Height (cm)	Number of leaves	Total Biomass in g
Family 3			Total Biomass in g		2-1-1-2	9	7	0.1118
2-3-1-1	1.5	2	0.0016		2-1-2-2	8	6	0.0338
2-3-2-1	2	2	0.003		2-1-3-2	12	9	0.1568
2-3-3-1	1	1	0.0007		2-1-4-2	5	7	0.0662
2-3-4-1	4	3	0.0098		2-1-5-2	5.5	6	0.0288
2-3-5-1	2	1	0.0006		2-1-7-2	7	7	0.0736
2-3-6-1	2.5	1	0.0021
2-3-7-1	4	1	0.0027
					Family 2			Total Biomass in g
					2-2-1-2	5	2	0.0023
Family 4			Total Biomass in g		2-2-2-2	8	10	0.1262
2-4-1-1	1	1	0.0009		2-2-3-2	6.5	4	0.0181
2-4-2-1	2	1	0.0012		2-2-4-2	7	6	0.0696
2-4-4-1	5	3	0.0085		2-2-5-2	5.5	7	0.0881
2-4-5-1	2	1	0.0008		2-2-6-2	11	7	0.0648
2-4-6-1	3	2	0.0023		2-2-7-2	7	7	0.0677
2-4-7-1	2	1	0.0008
					Family 3			Total Biomass in g
Family 5			Total Biomass in g		2-3-1-2	9.5	10	0.137
2-5-2-1	2	1	0.0009		2-3-2-2	11	7	0.0782
2-5-3-1	2	1	0.0009		2-3-3-2	11	6	0.062
2-5-4-1	2.5	1	0.0012		2-3-4-2	9.5	9	0.1957
2-5-5-1	3.5	3	0.007		2-3-5-2	8.5	8	0.0897
2-5-6-1	3	2	0.0012		2-3-6-2	10.5	8	0.0798
2-5-7-1	5	7	0.0504		2-3-7-2	10	9	0.1922
Family 6			Total Biomass in g		Family 4			Total Biomass in g
2-6-1-1					2-4-1-2	3.5	2	0.1118
2-6-2-1	2	1	0.001		2-4-3-2	11.5	8	0.165
2-6-3-1	1.5	1	0.0004		2-4-4-2	11	8	0.1361
2-6-6-1	3	2	0.0004		2-4-5-2	8	6	0.055
					2-4-6-2	8.5	7	0.1117
Family 7			Total Biomass in g
2-7-3-1	2	4	0.006		Family 5			Total Biomass in g
2-7-4-1	2	2	0.0012		2-5-1-2	9	8	0.0686
2-7-5-1	3	2	0.0017		2-5-2-2	9	7	0.0749
2-7-6-1	5.5	7	0.0263		2-5-5-2	10	6	0.0609
2-7-7-1	2.5	2	0.0011		2-5-6-2	7	6	0.0484
					2-5-7-2	5	6	0.0898
Family 8			Total Biomass in g
2-8-1-1	1.5	1	0.0004		Family 6			Total Biomass in g
2-8-2-1	3	3	0.0018		2-6-1-2	8.5	6	0.0992
1-8-3-1	1	4	0.008		2-6-2-2	9.5	7	0.0817
2-8-4-1	3	1	0.0006		2-6-3-2	7	8	0.0546
2-8-5-1	3.5	4	0.0006		2-6-4-2	7	6	0.0249
2-8-6-1	3	3	0.0022		2-6-5-2	9.5	9	0.1712
					2-6-6-2	9	8	0.1007
					2-6-7-2	7.5	6	0.041
Family 9			Total Biomass in g
2-9-1-1	2	1	0.0006		Family 7			Total Biomass in g
2-9-2-1	3.5	4	0.0234		2-7-1-2	8	9	0.0804
2-9-3-1	2	5	0.0234		2-7-2-2	4	4	0.0804
2-9-4-1	2	2	0.0008		2-7-3-2	6	4	0.0227
2-9-5-1	4	2	0.0062		2-7-4-2	8.5	8	0.0882
2-9-6-1	3	3	0.0036		2-7-5-2	7	8	0.0822
2-9-7-1	4.5	5	0.012		2-7-6-2	8.5	7	0.0784
					2-7-7-2	7.5	7	0.0656
Family 10			Total Biomass in g
2-10-1-2	0.5	1	0.0137		Family 8			Total Biomass in g
2-10-2-2	3.5	5	0.006		2-8-1-2	10	7	0.0994
2-10-3-2	3	2	0.0019		2-8-2-2	9	7	0.1036
2-10-4-2	1.5	1	0.0008		1-8-3-2	10	8	0.0836
2-10-5-2	3	5	0.0124		2-8-4-2	9	8	0.0942
2-10-6-2	4.5	3	0.0074		2-8-5-2	10	8	0.0634
					2-8-6-2	11	7	0.0739
					2-8-7-2	8	9	0.1113
					Family 9			Total Biomass in g
					2-9-1-2	6	7	0.048
					2-9-2-2	11	8	0.087
					2-9-3-2	7	7	0.0539
					2-9-4-2	8.5	7	0.1325
					2-9-5-2	6.5	8	0.0832
					2-9-7-2	7.5	7	0.0566
					Family 10			Total Biomass in g
					2-10-1-2	7	7	0.0531
					2-10-2-2	8	7	0.0493
					2-10-3-2	8.5	9	0.145
					2-10-4-2	7	8	0.0982
					2-10-6-2	10.5	11	0.1917
					2-10-7-2	11	7	0.136

## Sheet: Prosopis experiment
Seed collected at the tailings, growing off-site					Seeds collected at the tailings, growing in tailings material
Family 1	Height (cm)	Number of leaves	Total Biomass in g		Family 1	Height (cm)	Number of leaves	Total Biomass in g
1-1-8-2	10	10	0.0955		1-1-1-1
1-1-9-2					1-1-2-1
1-1-10-2	5	1	0.014		1-1-3-1	3.5	1	0.0051
1-1-11-2	9	6	0.0743		1-1-4-1	4.3	3	0.0074
1-1-12-2	8	5	0.0412		1-1-5-1
1-1-13-2	10	12	0.0983		1-1-6-1
1-1-14-2					1-1-7-1
Family 2					Family 2
1-2-41-2	10	7	0.0747		1-2-1-1	3	1	0.0062
1-2-42-2	7.5	4	0.042		1-2-2-1	5.5	3	0.0131
1-2-43-2	6.8	5	0.0192		1-2-3-1	4	3	0.0109
1-2-44-2	9.5	4	0.0375		1-2-4-1	4	3	0.0138
1-2-45-2	9	3	0.0457		1-2-5-1	7.5	6	0.0879
1-2-46-2	8	8	0.05		1-2-6-1	5	3	0.0218
1-2-47-2					1-2-7-1
1-2-48-2					1-2-8-1	4.5	3	0.0122
1-2-49-2					1-2-9-1	7.5	5	0.05925
1-2-50-2	7.5	6	0.0582		1-2-10-1	5	3	0.0146
1-2-51-2					1-2-11-1
1-2-52-2	8	5	0.0226		1-2-12-1	4.5	3	0.0128
1-2-53-2					1-2-13-1	2.5	3	0.0247
1-2-54-2	8	1	0.0409		1-2-14-1	4.5	1	0.0084
1-2-55-2	10	2	0.0582		1-2-15-1
1-2-56-2					1-2-16-1
1-2-57-2					1-2-17-1	4.3	3	0.0077
1-2-58-2	9.5	2	0.0545		1-2-18-1	3	1	0.009
1-2-59-2	11	3	0.0615		1-2-19-1	2.5	3	0.012
1-2-60-2	7	2	0.0322		1-2-20-1	3.8	2	0.0031
1-2-61-2					1-2-21-1	4.8	3	0.0139
1-2-62-2	11	5	0.0298		1-2-22-1	4.5	3	0.0093
1-2-63-2	9	4	0.04		1-2-23-1
1-2-64-2	8.5	4	0.049		1-2-24-1	4.3	3	0.012
1-2-65-2					1-2-25-1	4	3	0.0238
1-2-66-2	10	6	0.0622		1-2-26-1	5.8	4	0.0607
1-2-67-2					1-2-27-1	5.5	4	0.0153
1-2-68-2	8.5	7	0.084		1-2-28-1
1-2-69-2	8.8	4	0.038		1-2-29-1
1-2-70-2	7	1	0.0246		1-2-30-1
1-2-71-2	10.5	1	0.0438		1-2-31-1	5.3	3	0.0216
1-2-72-2					12-32-1
1-2-73-2	6.7	2	0.0264		1-2-33-1
1-2-74-2	10.5	2	0.066		1-2-34-1	5.5	5	0.0142
1-2-75-2	9.5	9	0.0879		1-2-35-1	4.7	5	0.0135
1-2-76-2	7	5	0.0276		1-2-36-1	5	3	0.0237
1-2-77-2	7	5	0.0373		1-2-37-1	4	2	0.0119
1-2-78-2					1-2-38-1	4.7	3	0.0083
1-2-79-2	7.5	5	0.0298		1-2-39-1	4	2	0.0087
1-2-80-2	9.7	2	0.0449		1-2-40-1	3.5	3	0.0074
Family 3					Family 3
1-3-41-2	4	4	0.0286		1-3-1-1	7	7	0.048
1-3-42-2					1-3-2-1
1-3-43-2					1-3-3-1
1-3-44-2	11.3	4	0.0976		1-3-4-1	2.5	1	0.0087
1-3-45-2					1-3-5-1	5	3	0.0152
1-3-46-2	9.3	1	0.0277		1-3-6-1
1-3-47-2	10	4	0.0905		1-3-7-1
1-3-48-2	10	3	0.0785		1-3-8-1	4	3	0.0101
1-3-49-2	4	1	0.0404		1-3-9-1
1-3-50-2	14	4	0.0601		1-3-10-1	3	3	0.0022
1-3-51-2					1-3-11-1	4.5	2	0.012
1-3-52-2					1-3-12-1
1-3-53-2					1-3-13-1	6.5	7	0.0488
1-3-54-2					1-3-14-1
1-3-55-2					1-3-15-1
1-3-56-2					1-3-16-1	4.5	3	0.012
1-3-57-2					1-3-17-1	6.3	3	0.0169
1-3-58-2	5.5	2	0.03		1-3-18-1	1	0
1-3-59-2					1-3-19-1	4.7	2	0.0117
1-3-60-2					1-3-20-1
1-3-61-2					1-3-21-1	5.5	4	0.0328
1-3-62-2	7	15	0.0718		1-3-22-1
1-3-63-2	12	6	0.0955		1-3-23-1	6	5	0.0195
1-3-64-2	11	8	0.0726		1-3-24-1	4.5	3	0.009
1-3-65-2	1.3	0			1-3-25-1
1-3-66-2					1-3-26-1	5.5	3	0.0403
1-3-67-2					1-3-27-1	5.5	5	0.0465
1-3-68-2					1-3-28-1	2	0
1-3-69-2					1-3-29-1	5.5	2	0.0121
1-3-70-2	10.5	8	0.1073		1-3-30-1
1-3-71-2	10.5	2	0.1072		1-3-31-1
1-3-72-2	12	13	0.0756		1-3-32-1	6.5	6	0.0262
1-3-73-2					1-3-33-1	6	3	0.0218
1-3-74-2					1-3-34-1	4.5	3	0.0207
1-3-75-2	12.8	15	0.1698		1-3-35-1	5	3	0.0533
1-3-76-2	7	2	0.015		1-3-36-1	5.5	3	0.0476
1-3-77-2	10	12	0.1082		1-3-37-1	5	2	0.0147
1-3-78-2	11	3	0.0383		1-3-38-1	4	3
1-3-79-2					1-3-39-1	4	3	0.0389
1-3-80-2	11	4	0.1338		1-3-40-1	5	5	0.0429
Family 4					Family 4
1-4-27-2					1-4-1-1	4.5	5	0.0308
1-4-28-2	13	6	0.1001		1-4-2-1	5.5	3	0.0135
1-4-29-2					1-4-3-1	4.6	4	0.0151
1-4-30-2	6.5	9	0.0328		1-4-4-1	4.5	2	0.0308
1-4-31-2	7	2	0.015		1-4-5-1	6	5	0.0467
1-4-32-2	11.5	3	0.0611		1-4-6-1
1-4-33-2	9	6	0.1054		1-4-7-1	6	5	0.0344
1-4-34-2	2	1	0.011		1-4-8-1	1.3	1	0.017
1-4-35-2	12	9	0.1415		1-4-9-1	5	3	0.0114
1-4-36-2					1-4-10-1	6	5	0.0548
1-4-37-2					1-4-11-1
1-4-38-2	10	3	0.0576		1-4-12-1
1-4-39-2	10	5	0.0624		1-4-13-1
1-4-40-2					1-4-14-1	4	3	0.0103
1-4-41-2	10.5	3	0.042		1-4-15-1	6	7	0.0172
1-4-42-2					1-4-16-1	5.5	5	0.024
1-4- 43-2	9	2	0.0264		1-4-17-1
1-4-44-2	12	4	0.0557		1-4-18-1
1-4-45-2					1-4-19-1
1-4-46-2					1-4-20-1	4.5	3	0.0341
1-4-47-2					1-4-21-1	6.5	5	0.0373
1-4-48-2	9	4	0.0443		1-4-22-1	6	5	0.0353
1-4-49-2	9.5	2	0.0363		1-4-23-1	6.5	5	0.0393
1-4-50-2	10	2	0.0421		1-4-24-1	8.5	9	0.0608
1-4-51-2	9.3	4	0.0356		1-4-25-1	5.3	3	0.0178
1-4-52-2					1-4-26-1	4	3	0.0029
Seeds collected outside the tailings, growing in off-site soil					Seeds collected outside the tailings, growing in tailings material
Family 5	Height (cm)	Number of leaves	Biomass in g		Family 5	Height (cm)	Number of leaves	Biomass in g
2-5-8-2	8	7	0.0098		2-5-1-1	3.5	3	0.0334
2-5-9-2					2-5-2-1
2-5-10-2					2-5-3-1	7	7	0.0221
2-5-11-2					2-5-4-1	5	5	0.0116
2-5-12-2					2-5-5-1	1.5	1	0.0178
2-5-13-2					2-5-6-1	3.5	3	0.0627
2-5-14-2	9	6	0.0662		2-5-7-1	5	5	0.0132
Family 6
2-6-41-2	1.5	1	0.004
2-6-42-2	9	10	0.0707		Family 6
2-6-43-2					2-6-1-1	5.8	5	0.0305
2-6-44-2					2-6-2-1	6	3	0.0339
2-6-45-2					2-6-3-1	4.5	3	0.0185
2-6-46-2	11	2	0.0483		2-6-4-1	6	7	0.0192
2-6-47-2	13.5	17	0.1344		2-6-5-1	5.5	5	0.0216
2-6-48-2	10	10	0.0854		2-6-6-1
2-6-49-2	8	2	0.1784		2-6-7-1	4.5	1	0.0078
2-6-50-2	8	2	0.0364		2-6-8-1	6.5	5	0.0293
2-6-51-2	8	8	0.046		2-6-9-1	3.5	3	0.0136
2-6-52-2	7	1	0.0192		2-6-10-1	6	6	0.0339
2-6-53-2					2-6-11-1	5.3	5	0.0484
2-6-54-2					2-6-12-1	4.5	3	0.0239
2-6-55-2					2-6-13-1	3	3	0.019
2-6-56-2					2-6-14-1	5	3	0.051
2-6-57-2					2-6-15-1	7	7	0.0379
2-6-58-2	9.5	3	0.0308		2-6-16-1
2-6-59-2	11	7	0.108		2-6-17-1	5	3	0.0147
2-6-60-2	12	10	0.0647		2-6-18-1	5	5	0.017
2-6-61-2	11	11	0.125		2-6-19-1	3	5	0.0052
2-6-62-2					2-6-20-1	4	3	0.0256
2-6-63-2	6	4	0.0326		2-6-21-1	4.5	3	0.0257
2-6-64-2	10	3	0.027		2-6-22-1	4	3	0.0093
2-6-65-2	8	3	0.0167		2-6-23-1	6	7	0.037
2-6-66-2	11.5	4	0.0355		2-6-24-1
2-6-67-2					2-6-25-1	4.7	3	0.0149
2-6-68-2	9.5	8	0.0806		2-6-26-1	3.5	3	0.0177
2-6-69-2	6.5	11	0.0772		2-6-27-1	0.5	1	0.0034
2-6-70-2	9.5	12	0.1011		2-6-28-1	7.8	9	0.026
2-6-71-2	8	2	0.0257		2-6-29-1	5.5	5	0.0307
2-6-72-2					2-6-30-1	4	3	0.0127
2-6-73-2	9.5	1	0.0871		2-6-31-1	4	3	0.0169
2-6-74-2					2-6-32-1	3.7	5	0.0257
2-6-75-2					2-6-33-1	6	5	0.0297
2-6-76-2	10.5	13	0.1139		2-6-34-1
2-6-77-2	9.5	8	0.1223		2-6-35-1	3.1	1	0.008
2-6-78-2	9	11	0.1068		2-6-36-1	5	3	0.0225
2-6-79-2					2-6-37-1	5	5	0.0257
2-6-80-2	9.5	10	0.0961		2-6-38-1	4.8	3	0.0282
					2-6-39-1	5.5	5	0.052
					2-6-40-1	2.5	1	0.012
Family 7
2-7-41-2
2-7-42-2	6.5	9	0.2182		Family 7
2-7-43-2					2-7-1-1	4	3	0.0334
2-7-44-2					2-7-2-1	5.3	3	0.0181
2-7-45-2	8	11	0.0982		2-7-3-1	6	3	0.0137
2-7-46-2	9	9	0.1283		2-7-4-1	4.5	3	0.0146
2-7-47-2					2-7-5-1	4.5	3	0.0114
2-7-48-2					2-7-6-1	6	5	0.0322
2-7-49-2	6	9	0.1023		2-7-7-1	3.5	3	0.0226
2-7-50-2	8	7	0.1291		2-7-8-1	4.5	3	0.0521
2-7-51-2					2-7-9-1	4.5	3	0.0314
2-7-52-2	10	11	0.1152		2-7-10-1	5	3	0.0374
2-7-53-2	9	9	0.1041		2-7-11-1	5.5	3	0.0471
2-7-54-2	6.5	7	0.0542		2-7-12-1	5.5	6	0.042
2-7-55-2	10	8	0.1222		2-7-13-1	5.5	4	0.0403
2-7-56-2	8	7	0.0764		2-7-14-1	4.5	3	0.0261
2-7-57-2	9	9	0.0335		2-7-15-1	4.3	2	0.0155
2-7-58-2	9.5	7	0.1207		2-7-16-1	4	3	0.0123
2-7-59-2	7.5	7	0.0795		2-7-17-1	4.3	3	0.0263
2-7-60-2	10.5	7	0.1546		2-7-18-1	4	2	0.007
2-7-61-2	8	6	0.1183		2-7-19-1	4	3	0.0296
2-7-62-2					2-7-20-1	5	1	0.0085
2-7-63-2	9	7	0.1152		2-7-21-1	3	1	0.014
2-7-64-2					2-7-22-1	3.5	1	0.0063
2-7-65-2	9	7	0.133		2-7-23-1	3.8	3	0.016
2-7-66-2					2-7-24-1	4.8	3	0.0178
2-7-67-2	8	5	0.0982		2-7-25-1	4	3	0.0144
2-7-68-2	9	9	0.0185		2-7-26-1	4	1	0.0049
2-7-69-2	9	6	0.1052		2-7-27-1	3.5	2	0.0092
2-7-70-2	8	7	0.0817		2-7-28-1	2.5	1	0.0069
2-7-71-2	7	9	0.0711		2-7-29-1	5	3	0.0055
2-7-72-2	7.5	7	0.0896		2-7-30-1	4	3	0.0167
2-7-73-2	8	7	0.1044		2-7-31-1	3	2	0.0121
2-7-74-2					2-7-32-1	5	3	0.0401
2-7-75-2	8.5	5	0.0523		2-7-33-1	5	3	0.013
2-7-76-2	9.5	9	0.0313		2-7-34-1
2-7-77-2	11.5	9	0.0403		2-7-35-1
2-7-78-2					2-7-36-1	3.7	3	0.0174
2-7-79-2	7.5	5	0.0271		2-7-37-1	4	3	0.0085
2-7-80-2					2-7-38-1
					2-7-39-1
					2-7-40-1	4.5	3	0.0336
Family 8
2-8-27-2
2-8-28-2	9	11	0.0788		Family 8
2-8-29-2	12	11	0.0707		2-8-1-1	5	3	0.0076
2-8-30-2					2-8-2-1	5.5	5	0.0183
2-8-31-2	13	11	0.1506		2-8-3-1	2.5	2	0.0099
2-8-32-2					2-8-4-1	9	9	0.073
2-8-33-2	11.5	13	0.1087		2-8-5-1	4.5	5	0.0351
2-8-34-2					2-8-6-1	5	5	0.0527
2-8-35-2	10.5	11	0.1111		2-8-7-1	5	3	0.0238
2-8-36-2					2-8-8-1	4	4	0.005
2-8-37-2					2-8-9-1
2-8-38-2					2-8-10-1	4	3	0.0148
2-8-39-2	9.5	9	0.11		2-8-11-1	4.5	3	0.0322
2-8-40-2	10.5	11	0.1267		2-8-12-1	5	3	0.0516
2-8-41-2	9	13	0.1294		2-8-13-1	8.3	4	0.0382
2-8-42-2	9.5	9	0.0733		2-8-14-1	6	7	0.0228
2-8-43-2	10.5	11	0.0554		2-8-15-1
2-8-44-2					2-8-16-1	4	2	0.006
2-8-45-2	11	11	0.0504		2-8-17-1	4	3	0.0024
2-8-46-2	7	7	0.0206		2-8-18-1	5	5	0.0225
2-8-47-2	10.5	9	0.0517		2-8-19-1	5.5	5	0.0407
2-8-48-2	3	4	0.0098		2-8-20-1
2-8-49-2	10	9	0.0554		2-8-21-1	4.5	3	0.0132
2-8-50-2	11	9	0.0449		2-8-22-1	2	1	0.0066
2-8-51-2	11	9	0.04		2-8-23-1	4.5	9	0.018
2-8-52-2					2-8-24-1	4	3	0.1104
					2-8-25-1	6	4	0.0482
					2-8-26-1	5	7	0.0359

## Sheet: Metal conc rhizo leaves
SAMPLE/ELEMENT	As	Ba	Ca	Cu	Fe	K	Mn	Mo	Pb	Rb	Sr	Ti	V	Zn	Zr
Rhizosphere tailing sample
Patch 1 Baccharis 1	16.49	1066.35	2251.65	170.9	20749.1	36456.8	165.19	40.23	27.72	248.44	134.3	1552.16	< LOD	< LOD	144.37
Patch 1 Baccharis 1	17.07	1057.97	2874.55	169.65	19290.9	33881.3	197.63	34.1	58.85	232.18	139.13	1437.09	< LOD	< LOD	137.07
Patch 1 Baccharis 1	16.61	1154.16	2562.49	174.59	19500.7	32689.2	201.73	32.98	22.94	221.94	108.81	1449.18	< LOD	< LOD	128.1
Patch 1 Baccharis 2	19.4	978.89	3255.49	187.98	21627.9	29148.9	243.62	72.04	33	217.56	223.23	1667.61	< LOD	< LOD	158.46
Patch 1 Baccharis 2	15.75	1013.32	4414.47	238.47	20548.4	27852	201.6	32.39	37.26	235.63	235.4	1676.47	< LOD	58.69	127.39
Patch 1 Baccharis 2	35.12	1192.27	3691.64	290.4	41957.2	23478.3	553.09	66.42	22.11	202.09	284.07	1372.23	< LOD	< LOD	107.99
Patch 1 Baccharis 3	15.87	1071.62	2075.02	150.11	15668	38182.7	219.09	31.32	27.13	260.02	103.96	1942.28	< LOD	< LOD	151.85
Patch 1 Baccharis 3	< LOD	1027.65	2217.08	136.74	15928.4	35761.7	171.03	28.36	31.94	252.16	96.1	1177.39	< LOD	< LOD	134.9
Patch 1 Baccharis 3	16.73	1088.55	1869.04	193.99	21185.7	34613.6	250.99	34.45	38.46	238.15	107.33	1378.21	< LOD	< LOD	134.91
Patch 1 Gnaphalium 1	37.3	679.63	5947	564.47	45004.4	24114.4	365.33	100.02	51.47	172.52	246.86	2237.85	< LOD	112	139.83
Patch 1 Gnaphalium 1	42.03	526.64	6582.66	862.63	45928.3	23650.3	316.41	99.98	54.28	155.89	229.02	2235.57	< LOD	108.34	129.99
Patch 1 Gnaphalium 1	38.14	672.77	6646.23	519.56	41211.7	23974.3	294.06	85.49	43.63	168.88	219.42	2421.27	< LOD	102.44	138.31
Patch 1 Gnaphalium 2	18.72	877.18	4938.35	203.47	29509.3	27553.3	236.98	52.37	39.33	213.97	209.9	1720.5	< LOD	< LOD	141.16
Patch 1 Gnaphalium 2	17.32	799.05	5207.11	175.64	22152.2	24981.6	283.27	37.12	24.55	188.6	135.07	1905.92	< LOD	69.76	128.81
Patch 1 Gnaphalium 2	23.97	846.94	6209.27	230.74	25617	25836	244.82	46.65	29.48	207.3	212.46	2538.75	< LOD	65.31	131.92
Patch 1 Gnaphalium 3	22.49	1142.23	5606.02	230.08	27857.8	30949.7	311.46	46.28	40.55	224.61	253.63	2577.15	< LOD	65.25	142.65
Patch 1 Gnaphalium 3	23.91	1100.42	4998.23	243.09	27316.7	31841.3	284.31	55.64	28.75	227.42	196.05	2588.82	< LOD	65.57	146.15
Patch 1 Gnaphalium 3	21.69	1040.39	6047.85	257.41	28065.7	29882.3	311.02	49.77	33.66	199.1	193.79	2339.41	< LOD	79.47	144.03
Patch 1 Brickellia 1	20.25	1069.73	3175.24	193.04	21950	30622.5	264.12	43.91	29.97	249.92	127.08	1710.92	< LOD	< LOD	133.8
Patch 1 Brickellia 1	20.39	1145.52	2631.17	218.59	27230.7	26201.5	208.85	36.31	97.53	213.76	93.42	1175	< LOD	< LOD	118.74
Patch 1 Brickellia 1	17.81	943.55	3781.39	231	22580.1	35236.6	287.26	69.89	28.31	227.62	177.39	1739.99	< LOD	< LOD	132.49
Patch 1 Brickellia 2	15.51	960.51	4777.63	169.14	22502.8	25574.8	202.2	41.8	23.66	182.36	184.97	1871.37	< LOD	< LOD	131.4
Patch 1 Brickellia 2	11.08	1130.53	2963.42	135.7	17540.5	31524.5	211.18	49.25	32.82	224.58	94	1276.04	< LOD	< LOD	140.2
Patch 1 Brickellia 2	15.89	1205.54	3506.39	197.11	25680.6	28965.1	296.02	40.42	45.6	234.1	113.3	1797.61	< LOD	< LOD	136.36
Patch 1 Brickellia 3	17.59	1098.97	2260.55	137.34	15632.5	32928	196.42	32.41	29.14	247.86	135.74	1408.73	< LOD	< LOD	133.86
Patch 1 Brickellia 3	21.91	1176.45	1933.37	162.32	21779.6	41439.7	228.53	43.7	27.62	277.3	108.97	1413.89	< LOD	< LOD	149.57
Patch 1 Brickellia 3	18.63	1106.26	3403.52	155.98	18350.2	39167.8	259.54	48.27	29.13	234.95	187.77	2076.76	< LOD	< LOD	151.92
Patch 1 Acacia 1	21.16	1094.99	4387.88	169.14	20913.8	33091.5	255.52	43.68	29.51	236.56	161.87	2168.93	< LOD	< LOD	151.48
Patch 1 Acacia 1	22.52	1051.49	3479.85	176.77	19988.8	32049.8	229.41	66.07	25.83	235.4	173.17	1837.43	< LOD	< LOD	134.04
Patch 1 Acacia 1	15.54	1095.47	2781.77	167.54	18883.5	32944.8	204.25	39.78	37.91	249.67	139.32	1646.23	< LOD	< LOD	136.16
Patch 1 Acacia 2	16.84	1001.4	2396.06	173.91	16629.9	26820.4	187.12	41.77	24.02	211.94	74.85	1249.94	< LOD	< LOD	130.24
Patch 1 Acacia 2	16.21	1199.53	2594.06	167.81	16824.3	33228.2	184.69	31.41	45.08	247.9	104.34	1614.19	< LOD	< LOD	143.49
Patch 1 Acacia 2	24.19	1090.43	3656.74	215.23	21283.4	32929	253.69	46.17	33.4	256.1	173.87	1971.15	< LOD	< LOD	145.14
Patch 1 Acacia 3	19.21	1113.79	3081.85	175.68	20233.3	36327.8	207	41.88	36.51	242.12	124.11	1904.75	< LOD	< LOD	132.04
Patch 1 Acacia 3	17.88	1054.64	3287.66	188.37	21071.6	37166.6	237.95	39.64	40.68	242.71	138.54	1939.56	< LOD	< LOD	151.36
Patch 1 Acacia 3	18.87	1117.99	1650.76	152.23	20706.1	38337.4	266.78	30.62	39.99	273.25	92.16	1787.09	< LOD	< LOD	132.48
Patch 2 Gnaphalium 1	35.76	1009.7	634.51	373.73	36609.8	39222.9	226.1	85.26	31.66	260.7	61.91	1767.32	< LOD	< LOD	136.66
Patch 2 Gnaphalium 1	19.87	1154.44	502.29	356.11	31329.9	36929.1	233.08	49.03	21.98	263.4	64.62	892.67	< LOD	< LOD	147.15
Patch 2 Gnaphalium 1	26.36	1112.5	565.14	343.88	34787.2	38887.4	248.01	66.43	34.76	266.76	63.79	1335.43	< LOD	< LOD	138.12
Patch 2 Gnaphalium 2	17.66	1139.01	992.36	237.8	24952.8	40479.6	194.37	57.6	26.92	261.31	74.38	1380.65	< LOD	< LOD	153.54
Patch 2 Gnaphalium 2	22.56	1113.54	1120.2	306.51	27694.4	40877.9	235.68	59.63	33.77	262.07	68.08	1982.06	< LOD	< LOD	153.99
Patch 2 Gnaphalium 2	26.84	1150.59	1413.39	547.85	41297.6	33145.2	236.33	90.59	20.58	267.96	56.75	986.91	< LOD	80.87	142.29
Patch 2 Gnaphalium 3	35.11	1088.84	877.79	517.92	38406.3	39754.9	278.11	95.64	43.93	249.29	70.58	1777.01	< LOD	63.23	144.57
Patch 2 Gnaphalium 3	30.71	1028.31	1106.16	553.91	39575.3	38522.3	268.58	81.56	52.23	256.62	80.27	1337.49	< LOD	69.22	130.61
Patch 2 Gnaphalium 3	31.42	1146.13	900.08	460.35	35517.8	36604.5	209.67	72.41	39.66	254.78	72.47	1354.49	< LOD	< LOD	128.28
Patch 2 Baccharis 1	24.29	1101.78	756.08	491.7	27407.1	38181.6	239.59	65.15	33.65	254.43	67.56	1506.63	< LOD	66.39	147.77
Patch 2 Baccharis 1	17.79	1142.78	478.45	352.89	21350.8	33782.5	208.64	39.84	22.73	248.49	63.12	885.09	< LOD	65.23	163.5
Patch 2 Baccharis 1	21.28	1267.83	722.32	477.6	25937.9	41454.3	277.84	60.71	28.21	275.57	76.12	1574.03	< LOD	73.82	149.46
Patch 2 Baccharis 2	35.99	999.51	984.49	442.02	36870.2	41795.3	256.22	85.1	54.31	260.95	65.04	2045.85	< LOD	65.58	135.13
Patch 2 Baccharis 2	22.39	1168.17	986.64	384.32	34535.8	41462.5	261.15	61.13	41.14	297.39	70.94	1544.78	< LOD	66.87	153.2
Patch 2 Baccharis 2	28.2	937.49	957.39	473.01	38981.7	37035.9	228.91	76.68	43.6	274.97	59.08	1289.68	< LOD	66.42	134.96
Patch 2 Baccharis 3	19.94	1050.22	5164.1	338.01	28414.8	31633.2	280.17	45.09	28.99	195.45	245.31	1923.03	< LOD	75.7	131.27
Patch 2 Baccharis 3	21.39	1255.58	4347.74	341.11	27154.2	30145.6	313.92	33.53	28.18	220.27	244.19	1639.51	< LOD	73.27	171.64
Patch 2 Baccharis 3	25.56	966.56	5699.81	429.8	30137.7	31960	369.29	57.06	40.63	220.19	170.8	1898.8	< LOD	105.82	156.33
Patch 2 Brickellia 2	32.86	1040.31	1458.19	537.42	43333.7	33605.6	307.52	153.47	34.39	232.17	59.24	998.68	< LOD	86.9	122.66
Patch 2 Brickellia 2	36.7	1005.87	1801.64	583.33	44831.3	36477.6	257.57	106.1	38.12	268.32	70.12	1208.4	< LOD	102.35	147
Patch 2 Brickellia 2	34.51	1011.21	1604.89	787.3	48253.7	34968.6	392.93	79.02	44.54	260.66	70.91	1252.57	< LOD	105.08	131.97
Patch 2 Brickellia 3	24.58	1153.01	655.18	365.3	31732.9	38228.1	228.55	58.54	26.86	252.22	65.35	1367.48	< LOD	< LOD	133.53
Patch 2 Brickellia 3	16.99	879.7	538.28	291.43	23674.5	31558.4	170.42	31.56	20.4	205.39	38.91	1028.44	< LOD	< LOD	136.26
Patch 2 Brickellia 3	24.27	1213.05	583.32	361.76	31690.9	42424.6	220.66	65.38	26.08	270.51	73.69	1589.08	< LOD	< LOD	147.97
Patch 2 Brickellia 4	20.14	1202.04	919.64	353.65	35811.6	39917.5	241.02	57.86	29.37	245.68	70.89	1483.72	< LOD	< LOD	142.35
Patch 2 Brickellia 4	19.51	1253.31	887.67	378.56	35097.8	34321.7	257.05	53.47	19.96	277.54	75.3	1425.86	< LOD	< LOD	145.46
Patch 2 Brickellia 4	27.78	1287.79	742.51	382.28	36170.7	38824.2	278.43	78.81	44.16	275.43	77.74	1412.47	< LOD	63.84	151.26
Patch 2 Acacia 1	19.72	1174.44	913.66	634.04	20672.5	42758.8	261.07	58.49	35.52	276.51	76.18	1440.4	< LOD	112.74	138.54
Patch 2 Acacia 1	22.6	1019.26	970.36	607.71	18911.5	41596.2	263.37	69.76	37.89	266.09	76.49	1622.7	< LOD	122.37	140.7
Patch 2 Acacia 1	18.38	1078.04	853.15	569.25	19396.6	42062.2	268.57	55.02	40.34	265.14	73.21	1448.25	< LOD	105.87	135.88
Patch 2 Acacia 2	30.74	892.96	2976.04	392.93	32056.6	40110.2	224.95	71.64	29.46	254.52	70.18	1333.28	< LOD	63.33	133.72
Patch 2 Acacia 2	24.35	1008.27	1733.25	358.92	29612.7	37290.2	201.59	61.54	32.21	275.08	80.38	1355.11	< LOD	59.88	147.45
Patch 2 Acacia 2	31.76	936.09	4530.67	440.71	33261.3	36994.2	190.45	76.7	28.89	238.08	100.04	1073.75	< LOD	77.2	142.36
Patch 2 Acacia 3	23.15	1206.78	992.09	372.27	32293.8	36432.5	211.61	65.28	35.06	246.11	72.43	1551.92	< LOD	< LOD	137.68
Patch 2 Acacia 3	30.52	1076.59	1673.88	458.82	36564.3	37259.1	234.53	84.05	42.81	266.38	73.51	1270.87	< LOD	65.69	140.4
Patch 2 Acacia 3	26.71	1408.29	1949.74	442.06	38463.4	36366.3	254.57	83.79	23.18	288.36	75.21	1227.79	< LOD	65.81	140.63
Patch 2 Prosopis 1	41.69	1283.8	936.59	766.21	17300.9	42834.1	247.07	57.84	66.3	267.59	73.99	1388.49	< LOD	99.52	125.58
Patch 2 Prosopis 1	20.33	1223.58	761.07	511.83	22633.2	39134.3	238.14	52.29	24.19	288.17	79.14	1544.08	< LOD	67.21	157.48
Patch 2 Prosopis 1	18	1070	1188.32	1165.75	17792.2	38513.7	251.25	46.38	36.12	234.95	90.3	1377.33	< LOD	89.36	131.58
Patch 2 Prosopis 2	22.87	1016.72	449.43	631.79	30647.8	34840.4	238.18	56.82	36.26	271.26	66.45	1527.18	< LOD	< LOD	143.24
Patch 2 Prosopis 2	29.06	1027.63	464.96	370.25	28034.9	36932.6	223.13	67.21	30.16	268.98	62.37	1128.26	< LOD	< LOD	138.41
Patch 2 Prosopis 2	25.21	1140.23	452.6	333.49	24691.5	41164.1	243.76	60.33	31.39	273.34	70.22	1544.19	< LOD	< LOD	141.04
Patch 3 Prosopis 1	16.65	1101.26	4811.37	376.19	43101.6	30205.9	363.72	73.03	38.32	217.5	143.02	2747.18	< LOD	< LOD	140.91
Patch 3 Prosopis 1	17.82	1257.29	3915.52	302.43	36060.4	35373.3	270.12	76.27	29.66	270.35	142.64	2136.32	< LOD	< LOD	141.4
Patch 3 Prosopis 1	21.59	1038.43	3763.05	340.71	43253.4	33711	283.29	87.47	23.56	277.24	126.31	2057.6	< LOD	65.93	148.1
Patch 3 Prosopis 2	26.65	1254.16	4732.83	381.07	47592.2	35419.8	380.02	90.83	31.73	257.63	183.11	2643.97	< LOD	< LOD	149.87
Patch 3 Prosopis 2	21.27	1177.24	8021.4	313.02	36923.8	30377.7	292.29	60.1	28.9	234.54	123.92	1616.59	< LOD	< LOD	129.56
Patch 3 Prosopis 2	22.15	1237.21	8662.64	389.57	44108.9	32699.6	405.06	103.39	29.69	270.15	136.83	2184.29	< LOD	< LOD	154.32
Patch 3 Prosopis 3	16.66	1162.3	3434.98	288.85	32825.9	31874.2	230.9	55.2	20.77	237.73	107.41	2013.24	< LOD	< LOD	128.12
Patch 3 Prosopis 3	21.77	1527.7	2928.62	289.68	40072.8	36525.2	299.37	70.94	26.1	298.75	148.08	1963.25	< LOD	< LOD	154.72
Patch 3 Prosopis 3	19.43	1220.56	2984.46	1366.03	34608.9	35783.4	275.82	58.96	39.71	287.87	122.14	1935.56	< LOD	< LOD	136.87
Patch 3 Prosopis 4	15.45	1341.88	3085.42	259.93	31865.7	37789	279.03	54.9	30.56	284.25	107.86	2061.86	< LOD	< LOD	160.16
Patch 3 Prosopis 4	17.08	1251.9	3107.92	273.58	32012.6	29201.9	265.99	48.73	33.59	246.32	114.28	1314.83	< LOD	< LOD	143.22
Patch 3 Prosopis 4	18.57	1227.37	2365.43	222.71	27649.2	36264.3	254.24	52.21	19.48	241	99.46	1428.14	< LOD	< LOD	140.84
Leaves
Patch 1 Gnaphalium 1 leaves	< LOD	< LOD	19302	225.51	5431.58	74051.5	530	18.58	< LOD	121.95	43.63	223.65	< LOD	481.78	16.91
Patch 1 Gnaphalium 1 leaves	< LOD	< LOD	17625	217.28	4665.55	67610.3	436.99	17.93	< LOD	120.82	41.52	216.34	< LOD	451.93	14.57
Patch 1 Gnaphalium 1 leaves	< LOD	< LOD	19404.3	247.36	6155.26	75733.1	641.6	18.68	< LOD	124.04	42.15	228.77	< LOD	536.71	16.68
Patch 1 Gnaphalium 2 leaves	< LOD	< LOD	15999.9	273.42	7575.81	75003	347.94	20.2	9.07	117.62	63.61	232.53	< LOD	590.04	25.31
Patch 1 Gnaphalium 2 leaves	< LOD	< LOD	15945.9	264.24	6599.16	77297.1	374.8	18	5.13	113.7	63.29	< LOD	< LOD	522.42	23.05
Patch 1 Gnaphalium 2 leaves	< LOD	< LOD	15762.7	275.17	6710.75	75306.1	345.72	19.56	6.4	117.66	67.79	< LOD	< LOD	553.35	22.73
Patch 1 Gnaphalium 3 leaves	< LOD	< LOD	17841.7	215.47	4523.49	79481.8	340.39	17.74	< LOD	95.67	61.37	< LOD	< LOD	373.1	16.23
Patch 1 Gnaphalium 3 leaves	< LOD	< LOD	17960.2	160.13	2681.8	78828	198.83	16.08	< LOD	94.64	63.4	< LOD	< LOD	332.52	15.55
Patch 1 Gnaphalium 3 leaves	< LOD	< LOD	16797.7	199.42	4459.27	78568.1	281.64	15.9	3.55	95.27	66.22	< LOD	< LOD	353.16	15.78
Patch 1 Acacia 1 leaves	< LOD	< LOD	21194.9	78.65	761.43	30138.2	< LOD	12.61	< LOD	65.22	37.36	< LOD	< LOD	81.1	10.45
Patch 1 Acacia 1 leaves	< LOD	< LOD	20586.8	84.85	740.59	29626.4	< LOD	11.79	< LOD	65.29	37.72	< LOD	< LOD	77.73	9.85
Patch 1 Acacia 1 leaves	< LOD	< LOD	20437.6	78.41	817.15	29467.1	< LOD	12.68	< LOD	63.74	36.33	< LOD	< LOD	82.53	10.04
Patch 1 Acacia 2 leaves	< LOD	< LOD	22591.6	121.7	447.8	24311.5	< LOD	13.22	< LOD	56.95	37.52	< LOD	< LOD	< LOD	10.2
Patch 1 Acacia 2 leaves	< LOD	< LOD	20627.5	118.82	452.88	23241.5	< LOD	12.53	< LOD	55.48	36.52	< LOD	< LOD	60.6	9.73
Patch 1 Acacia 2 leaves	< LOD	< LOD	21805.1	116.14	450.65	24477.4	< LOD	12.99	< LOD	58.19	36.51	< LOD	< LOD	60.01	10.87
Patch 1 Acacia 3 leaves	< LOD	< LOD	12337.7	109.35	330.27	31344.8	< LOD	12.54	< LOD	48.71	17.81	< LOD	< LOD	59.2	10.32
Patch 1 Acacia 3 leaves	< LOD	< LOD	12203.4	109.02	297.89	27746	< LOD	13.58	< LOD	47.22	19.39	< LOD	< LOD	< LOD	10.24
Patch 1 Acacia 3 leaves	< LOD	< LOD	12225	93.34	268.96	30114	< LOD	13.99	< LOD	46.94	18.01	< LOD	< LOD	< LOD	11.08
Patch 1 Baccharis 1 leaves	< LOD	< LOD	12226.8	91.78	214.82	66965.3	< LOD	12.2	< LOD	87.05	14.96	< LOD	< LOD	139.64	9.72
Patch 1 Baccharis 1 leaves	< LOD	< LOD	12155.6	66.49	142.13	72520.3	< LOD	10.72	< LOD	86.15	14.97	< LOD	< LOD	129.86	8.48
Patch 1 Baccharis 1 leaves	< LOD	< LOD	11110	67.08	148.34	63803.1	< LOD	11.3	< LOD	86.58	14.82	< LOD	< LOD	126.52	8.93
Patch 1 Baccharis 2 leaves	< LOD	< LOD	16283.6	73.54	142.97	39445.2	< LOD	11.9	< LOD	51.41	29.56	< LOD	< LOD	154.77	9.68
Patch 1 Baccharis 2 leaves	< LOD	< LOD	16289.1	61.62	105.7	41356.1	< LOD	11.72	< LOD	49.96	28.92	< LOD	< LOD	142.86	8.5
Patch 1 Baccharis 2 leaves	< LOD	< LOD	16882.1	57.55	114.96	40219.9	< LOD	11.46	< LOD	50.11	28.36	< LOD	< LOD	146.64	8.7
Patch 1 Baccharis 3 leaves	< LOD	< LOD	16260	56.43	95.83	53747.2	< LOD	9.95	< LOD	46.83	29.92	< LOD	< LOD	118.43	< LOD
Patch 1 Baccharis 3 leaves	< LOD	< LOD	17082.2	52.03	101.21	50592.1	< LOD	9.27	< LOD	44.02	26.93	< LOD	< LOD	108.03	< LOD
Patch 1 Baccharis 3 leaves	< LOD	< LOD	16482.2	< LOD	86.38	52862.4	< LOD	9.35	< LOD	44.9	28.01	< LOD	< LOD	108.59	< LOD
Patch 1 Brickellia 1 leaves	< LOD	< LOD	24607.9	43	270.09	45615.2	413.9	11.11	< LOD	51.3	63.71	< LOD	< LOD	185.53	7.83
Patch 1 Brickellia 1 leaves	< LOD	< LOD	23516.4	< LOD	224.58	45212.2	370.75	9.46	< LOD	49.99	63.89	< LOD	< LOD	168.53	< LOD
Patch 1 Brickellia 1 leaves	< LOD	< LOD	23039.8	44.3	259.79	45925.4	434.36	10.61	< LOD	51.72	68.09	< LOD	< LOD	187.37	7.66
Patch 1 Brickellia 2 leaves	< LOD	< LOD	20523.3	47.77	239.12	62583.3	< LOD	10.74	< LOD	57.28	69.65	< LOD	< LOD	104.87	7.73
Patch 1 Brickellia 2 leaves	< LOD	< LOD	18341.4	69.45	325.78	58511.8	40.04	10.18	< LOD	54.6	48.2	< LOD	< LOD	103.5	7.83
Patch 1 Brickellia 2 leaves	< LOD	< LOD	19325.1	51.2	243.71	57815.2	< LOD	9.45	< LOD	55.21	53.39	< LOD	< LOD	89.91	7.81
Patch 1 Brickellia 3 leaves	< LOD	< LOD	23384.8	47.48	423.04	45805.8	164.45	10.74	< LOD	45.22	74.61	< LOD	< LOD	75.71	< LOD
Patch 1 Brickellia 3 leaves	< LOD	< LOD	22245	< LOD	360.56	43678.5	151.08	10.43	< LOD	46.8	74.29	< LOD	< LOD	79.77	8.6
Patch 1 Brickellia 3 leaves	< LOD	< LOD	23595.2	51.03	466.71	47641.9	182.22	10.79	< LOD	45.92	72.44	< LOD	< LOD	83.81	7.54
Patch 2 Prosopis 1 leaves	< LOD	< LOD	65177.4	210.78	1832.45	8748.9	< LOD	14.34	< LOD	47.58	404.65	< LOD	< LOD	576.41	< LOD
Patch 2 Prosopis 1 leaves	< LOD	< LOD	62365.4	210.07	1736.73	8081.75	< LOD	14.68	< LOD	48.44	418.79	< LOD	< LOD	645.69	< LOD
Patch 2 Prosopis 1 leaves	< LOD	< LOD	67681.5	206.48	1870.68	9106.87	< LOD	14.37	< LOD	46.86	409.43	< LOD	< LOD	589.3	8.07
Patch 2 Prosopis 2 leaves	< LOD	< LOD	55249.8	190.33	2600.64	8722.12	< LOD	13.71	< LOD	52.36	290.69	207.52	< LOD	216.61	10.26
Patch 2 Prosopis 2 leaves	< LOD	< LOD	55223.8	141.94	1697.86	8055.34	< LOD	12.81	< LOD	48.77	281.77	< LOD	< LOD	169.99	10.09
Patch 2 Prosopis 2 leaves	< LOD	< LOD	55347.2	164.51	2149.75	8463.45	< LOD	13.06	< LOD	50.03	281.54	< LOD	< LOD	179.31	8.72
Patch 2 Brickellia 1 leaves	< LOD	< LOD	19332.5	66.45	890.62	60569.3	429.85	11.74	< LOD	83.43	24.15	< LOD	< LOD	406.7	8.3
Patch 2 Brickellia 1 leaves	< LOD	< LOD	19164.7	64.5	763.99	60806.4	448.77	11.58	< LOD	82.74	24.7	< LOD	< LOD	400.07	< LOD
Patch 2 Brickellia 1 leaves	< LOD	< LOD	18780	115.36	1246.92	59592.7	644.83	14.68	< LOD	89.37	27.73	< LOD	< LOD	524.45	10.75
Patch 2 Brickellia 2 leaves	< LOD	< LOD	24136.2	71.54	348.28	49230.7	383.76	10.81	< LOD	25.85	46.65	< LOD	< LOD	391.06	< LOD
Patch 2 Brickellia 2 leaves	< LOD	< LOD	26039.9	45.03	196.4	51085.3	246.73	< LOD	< LOD	26.15	48.08	< LOD	< LOD	332.73	< LOD
Patch 2 Brickellia 2 leaves	< LOD	< LOD	24092.8	73.46	346.05	48693.1	432.45	10.37	< LOD	29.36	44.44	< LOD	< LOD	424.05	7.94
Patch 2 Brickellia 3 leaves	< LOD	< LOD	19659.9	73.29	414.37	59717.2	449.94	9.99	< LOD	43.8	35.31	< LOD	< LOD	374.73	8.47
Patch 2 Brickellia 3 leaves	< LOD	< LOD	19768.6	68.69	413.9	63219.8	488.91	10.08	< LOD	45.19	36.06	< LOD	< LOD	369.69	7.44
Patch 2 Brickellia 3 leaves	< LOD	< LOD	18380.8	55.32	301.77	58756.5	400.99	10.37	< LOD	43.34	33.69	< LOD	< LOD	350.47	< LOD
Patch 2 Bachharis 1 leaves	< LOD	< LOD	27116.9	80.34	166.64	27113.3	< LOD	11.37	< LOD	33.09	111.04	< LOD	< LOD	592.13	< LOD
Patch 2 Bachharis 1 leaves	< LOD	< LOD	29776	80.21	158.09	25859.9	< LOD	11.35	< LOD	31.6	108.51	< LOD	< LOD	560.48	< LOD
Patch 2 Bachharis 1 leaves	< LOD	< LOD	24206.7	126.59	317.07	24646.5	< LOD	12.74	< LOD	34.77	112.11	< LOD	< LOD	744.81	9.52
Patch 2 Bachharis 2 leaves	< LOD	< LOD	22301.9	77.84	197.7	43284.1	< LOD	11.21	< LOD	86.98	73.1	< LOD	< LOD	429.96	8.26
Patch 2 Bachharis 2 leaves	< LOD	< LOD	21778.7	88.48	204.52	42482.3	< LOD	10.97	< LOD	86.1	72.31	< LOD	< LOD	440.87	7.69
Patch 2 Bachharis 2 leaves	< LOD	< LOD	22715.5	70.6	150.69	43759.4	< LOD	11.09	< LOD	86.16	72.83	< LOD	< LOD	413.72	< LOD
Patch 2 Bachharis 3 leaves	< LOD	< LOD	23436.8	64.65	369.74	39838	< LOD	11.35	< LOD	53.92	60.42	< LOD	< LOD	216.88	8.42
Patch 2 Bachharis 3 leaves	< LOD	< LOD	21731.2	61.07	245.62	39709.5	< LOD	11.27	< LOD	53.84	60.4	< LOD	< LOD	222.01	8.91
Patch 2 Bachharis 3 leaves	< LOD	< LOD	23309.7	55.25	250.21	41369.3	< LOD	10.88	< LOD	52.78	57.43	< LOD	< LOD	193.66	33.22
Patch 2 Gnaphalium 1 leaves	< LOD	< LOD	19429.2	207.47	2615.92	69368.5	881.86	15.1	< LOD	47.48	63.06	< LOD	< LOD	759.62	13.66
Patch 2 Gnaphalium 1 leaves	< LOD	< LOD	19915.3	231.82	2958.17	69792.5	1013.27	17	< LOD	51.45	66.61	< LOD	< LOD	816.72	13.2
Patch 2 Gnaphalium 1 leaves	< LOD	< LOD	18842.4	352.53	4542.33	66702.7	1663.26	17.41	< LOD	44.22	58.36	< LOD	< LOD	883.78	14.74
Patch 2 Gnaphalium 2 leaves	< LOD	< LOD	21314.1	289.02	4033	66386.6	1267.06	17.75	< LOD	51.45	58.49	< LOD	< LOD	1062.1	14.06
Patch 2 Gnaphalium 2 leaves	< LOD	< LOD	20846.4	246.55	3348.96	64433	1103.7	15.81	< LOD	50.1	60.78	< LOD	< LOD	985.4	13.18
Patch 2 Gnaphalium 2 leaves	< LOD	< LOD	21174.2	254.17	3554.14	66031.5	1063.79	18	< LOD	53.53	60.5	< LOD	< LOD	993.04	13.07
Patch 2 Gnaphalium 3 leaves	< LOD	< LOD	15132.7	459.81	3350.24	80725.8	1605.1	16.27	< LOD	48.87	30.8	< LOD	< LOD	1604.64	13
Patch 2 Gnaphalium 3 leaves	< LOD	< LOD	14936.4	438.18	3522.88	79909.3	1516.17	16.93	< LOD	49.13	31.84	< LOD	< LOD	1559.67	13.67
Patch 2 Gnaphalium 3 leaves	< LOD	< LOD	15932.6	473.37	3472.86	83604.8	1830.13	16.44	< LOD	47.53	31	< LOD	< LOD	1667.03	14.19
Patch 2 Acacia 1 leaves	< LOD	< LOD	28799.4	162	1272.18	22691.1	< LOD	13.71	< LOD	51.84	112.52	< LOD	< LOD	298.52	9.4
Patch 2 Acacia 1 leaves	< LOD	< LOD	30021.7	146.32	1023.35	20940.1	< LOD	14.28	< LOD	51.7	112.09	< LOD	< LOD	276.97	10.41
Patch 2 Acacia 1 leaves	< LOD	< LOD	28990.3	145.9	1140.46	22345	< LOD	14.7	< LOD	53.05	112.85	< LOD	< LOD	289.94	10.04
Patch 2 Acacia 2 leaves	< LOD	< LOD	22298.3	144.98	739.76	25122.4	< LOD	13.44	< LOD	45.09	75.75	< LOD	< LOD	152.81	10.59
Patch 2 Acacia 2 leaves	< LOD	< LOD	19974.8	143.66	801.8	22020.8	< LOD	14.39	< LOD	42.9	72.11	< LOD	< LOD	151.2	12.24
Patch 2 Acacia 2 leaves	< LOD	< LOD	22177.9	118.33	656.18	25886.5	< LOD	13.77	< LOD	46.55	73.48	< LOD	< LOD	140.13	11.33
Patch 2 Acacia 3 leaves	< LOD	< LOD	50216.1	177.89	4084.3	17991.1	113.29	16.66	< LOD	58.3	206.19	< LOD	< LOD	352.92	9.37
Patch 2 Acacia 3 leaves	< LOD	< LOD	46884.8	150.09	3263.08	17840.1	< LOD	17.31	< LOD	56.23	201.3	< LOD	< LOD	312.86	8.88
Patch 2 Acacia 3 leaves	< LOD	< LOD	50935.8	138.59	3108.16	18053.1	< LOD	15.78	< LOD	54.53	202.4	< LOD	< LOD	300.71	8.05
Patch 3 Prosopis 1 leaves	< LOD	< LOD	26079.1	194.74	2160.66	26606.8	< LOD	15.24	< LOD	36.28	35.43	< LOD	< LOD	147.31	11.77
Patch 3 Prosopis 1 leaves	< LOD	< LOD	25928.8	176.31	2072.76	27637.3	< LOD	14.84	< LOD	36.06	35.1	< LOD	< LOD	140.63	10.83
Patch 3 Prosopis 1 leaves	< LOD	< LOD	26059.5	216.96	2527.56	27380.8	< LOD	16.48	< LOD	37.43	36.15	< LOD	< LOD	157.99	11.16
Patch 3 Prosopis 2 leaves	< LOD	< LOD	55861.3	305.55	1411.08	25366.1	< LOD	15.87	< LOD	30.43	110.9	< LOD	< LOD	356.89	9.16
Patch 3 Prosopis 2 leaves	< LOD	< LOD	54198.7	305.33	1694.77	25740.4	< LOD	16.98	< LOD	31.03	110.19	< LOD	< LOD	368.59	9.7
Patch 3 Prosopis 2 leaves	< LOD	< LOD	55631.4	300.23	1350.14	25650.6	< LOD	15.4	< LOD	30.38	111.69	< LOD	< LOD	381.67	9.05
Patch 3 Prosopis 3 leaves	< LOD	< LOD	44804.8	185.74	1411.04	29195.8	< LOD	14.41	< LOD	53.12	123.72	< LOD	< LOD	335.76	8.82
Patch 3 Prosopis 3 leaves	< LOD	< LOD	43558.3	163.07	1258.51	27741.3	< LOD	12.6	< LOD	50.34	122.33	< LOD	< LOD	298.82	7.44
Patch 3 Prosopis 3 leaves	< LOD	< LOD	43890.3	214.2	1595.85	30186.4	< LOD	14.51	< LOD	53.14	129.67	< LOD	< LOD	365.98	8.8
Patch 3 Prosopis 4 leaves	< LOD	< LOD	50453.8	202.2	1245.84	32808.1	< LOD	12.24	< LOD	67.17	202.14	< LOD	< LOD	420.95	8.32
Patch 3 Prosopis 4 leaves	< LOD	< LOD	47060.5	164.76	899.41	31750.2	< LOD	13.3	< LOD	66.4	204.77	< LOD	< LOD	384.18	< LOD
Patch 3 Prosopis 4 leaves	< LOD	< LOD	51477.1	199.96	1227.79	32940.4	< LOD	12.46	< LOD	65.71	199.2	< LOD	< LOD	433.37	< LOD
LOD: Below the detection level
